# Supplementary material for: Oligonucleotides containing a ribo-configured cyclohexanyl nucleoside: probing the role of sugar conformation in base pairing selectivity
Source: Royal Society of Chemistry journal article supplement (doi:10.1039/c5ob01449b), 2015-01-01
Supplement: c5ob01449b1.pdf [file c5ob01449b1.pdf]

# Oligonucleotides Containing a *Ribo*-Configured Cyclohexanyl Nucleoside: Probing the Role of Sugar Conformation in Base Pairing Selectivity

Concetta Paoletta,<sup>a</sup> Daniele D'Alonzo,<sup>a,\*</sup> Guy Schepers,<sup>b</sup> Arthur Van Aerschot,<sup>b</sup> Giovanni Di  
Fabio,<sup>a</sup> Giovanni Palumbo,<sup>a</sup> Piet Herdewijn<sup>b,\*</sup> and Annalisa Guaragna<sup>a</sup>

<sup>a</sup>*Dipartimento di Scienze Chimiche, Università degli Studi di Napoli Federico II, via Cintia, 80126*

*Napoli (Italy);* <sup>b</sup>*Laboratory for Medicinal Chemistry, Rega Institute for Medical Research, KU*

*Leuven, Minderbroedersstraat 10, 3000 Leuven (Belgium)*

[dandalonzo@unina.it](mailto:dandalonzo@unina.it); [Piet.Herdewijn@rega.kuleuven.be](mailto:Piet.Herdewijn@rega.kuleuven.be)

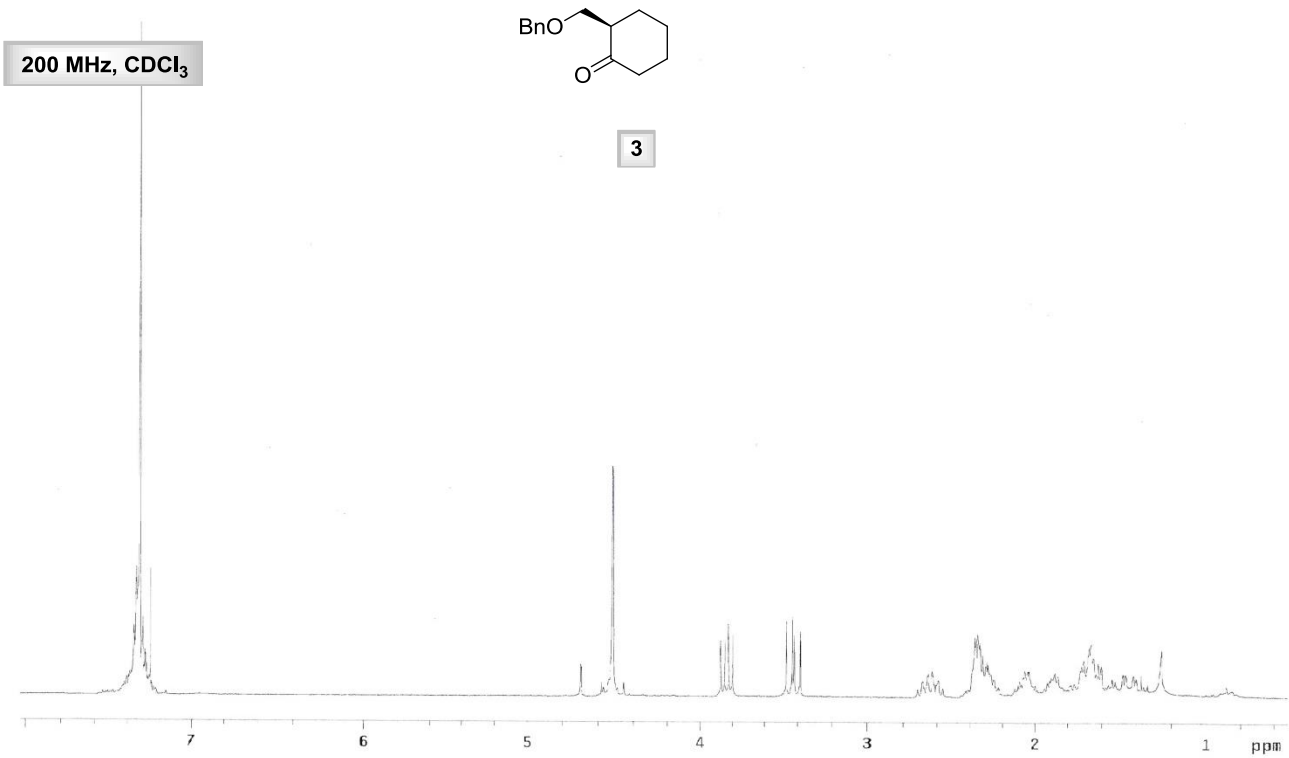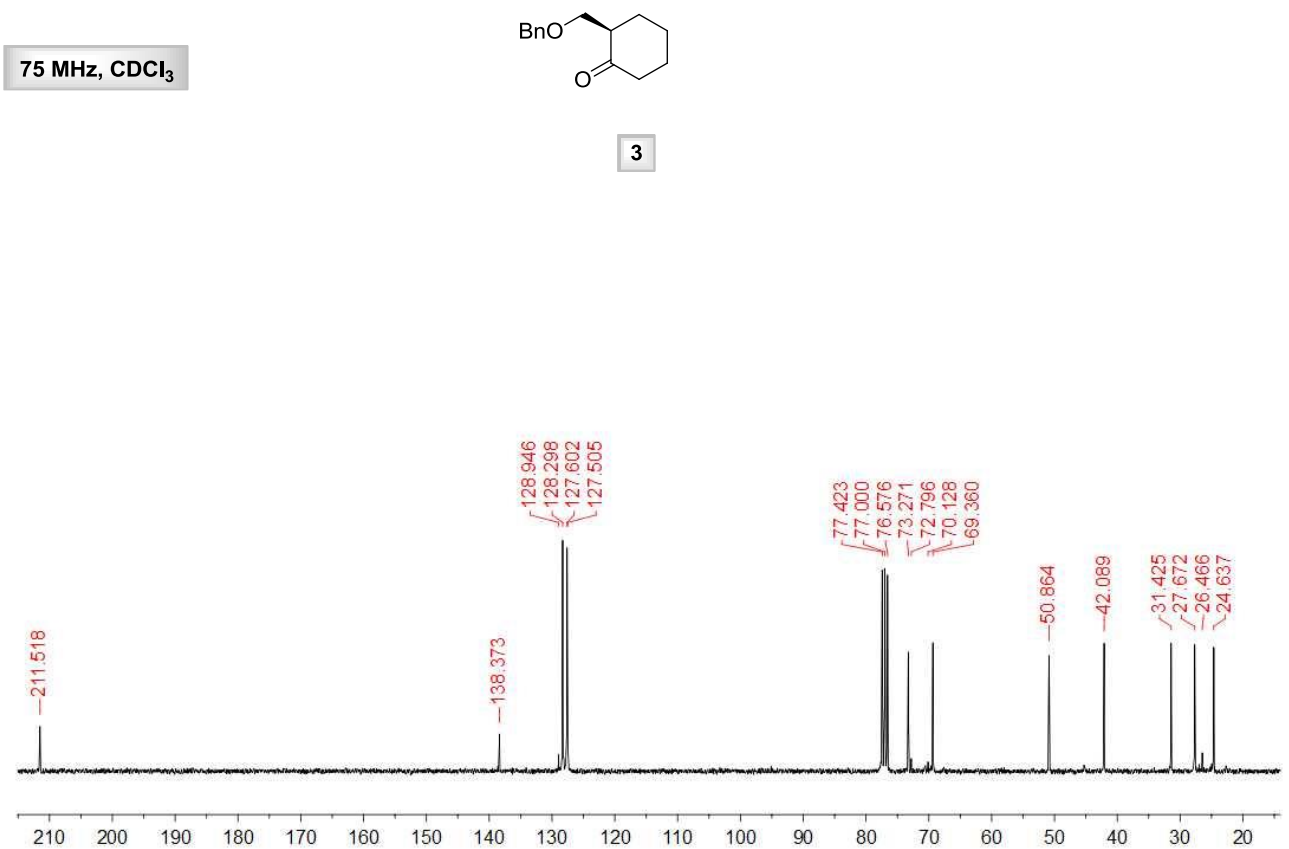

200 MHz, CDCl<sub>3</sub>

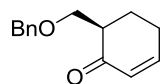

4a

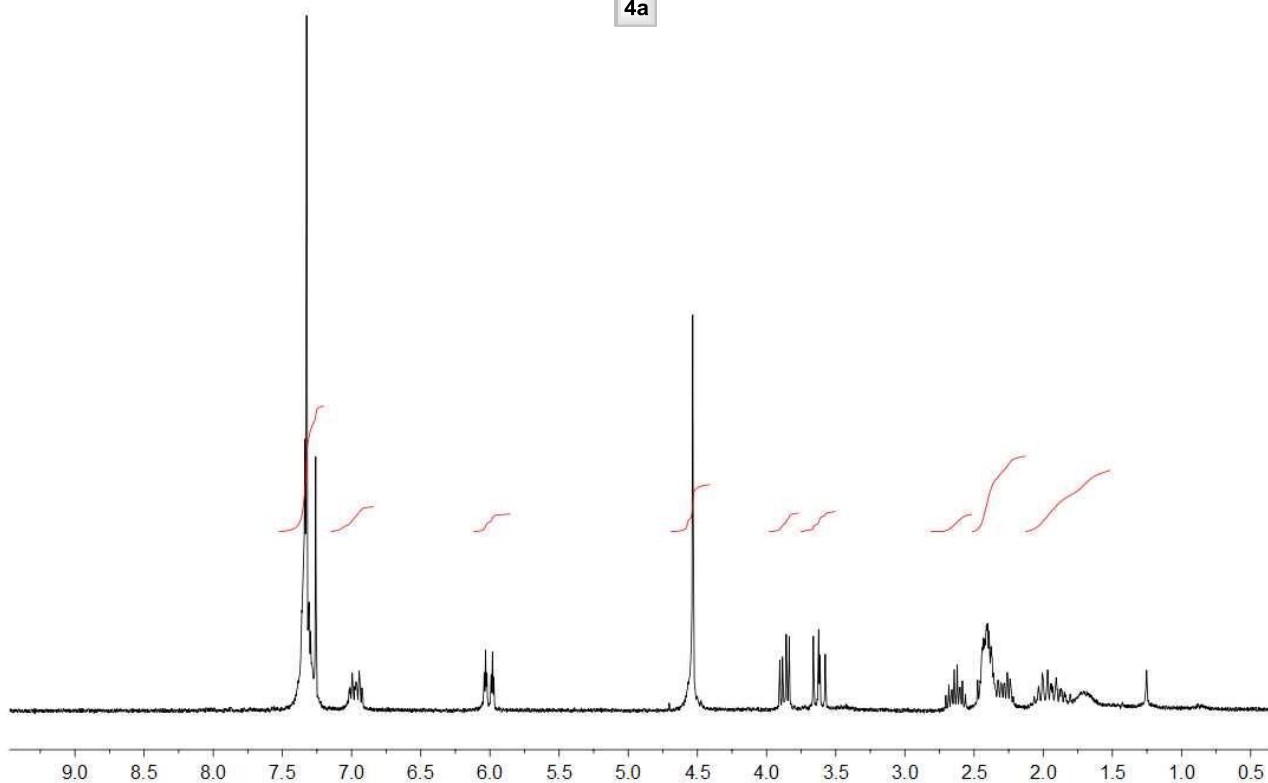

50 MHz, CDCl<sub>3</sub>

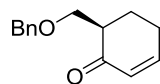

4a

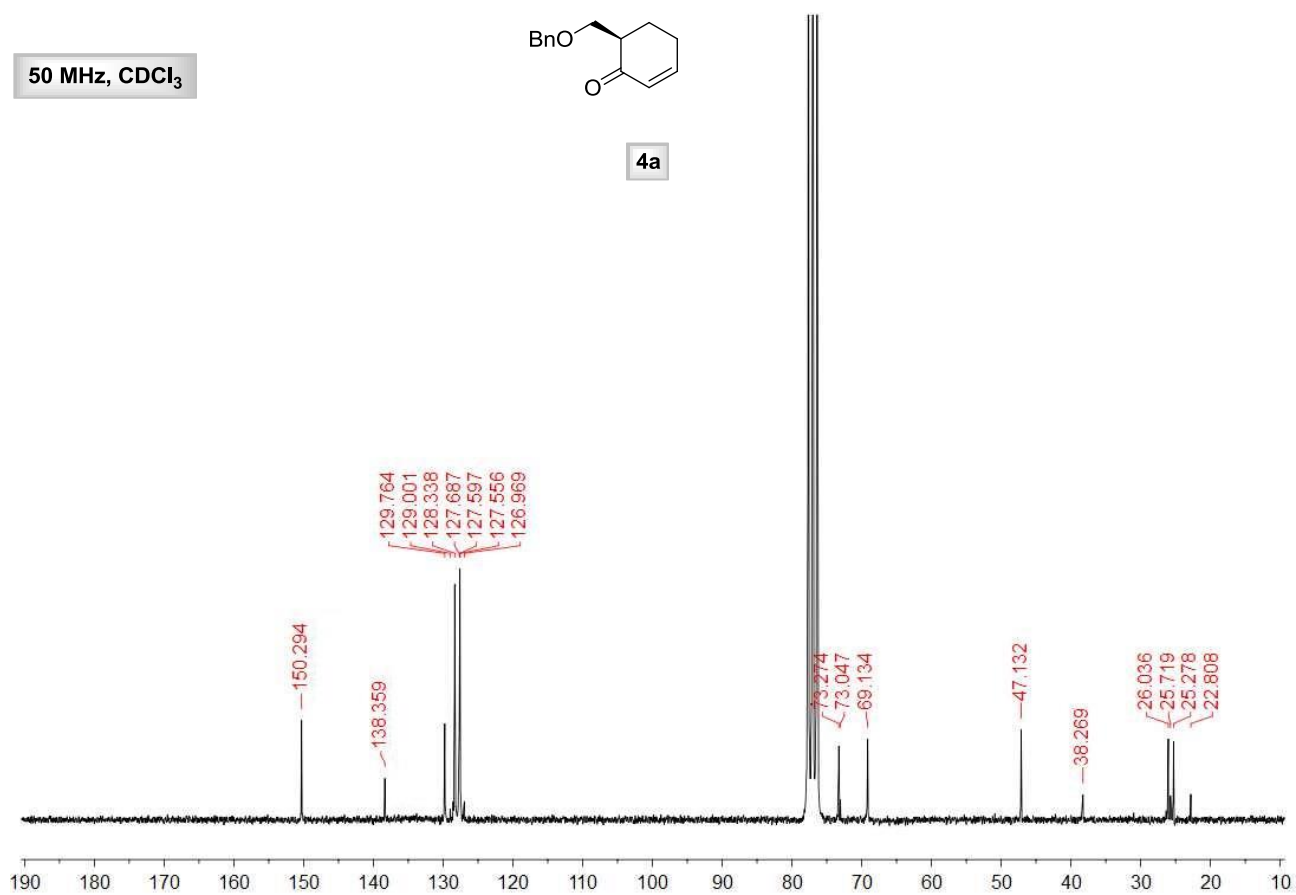

200 MHz, CDCl<sub>3</sub>

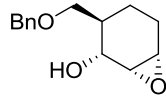

6

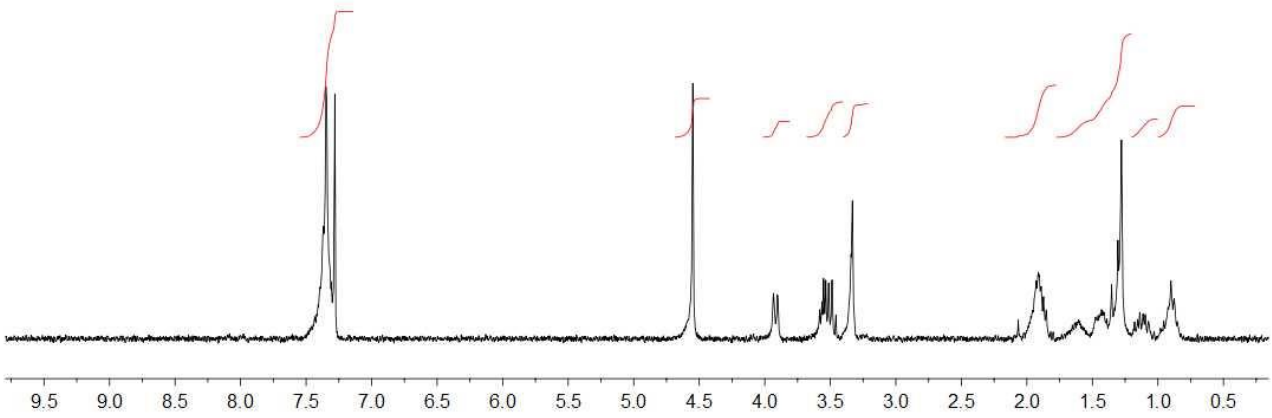

75 MHz, CDCl<sub>3</sub>

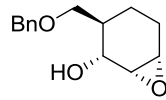

6

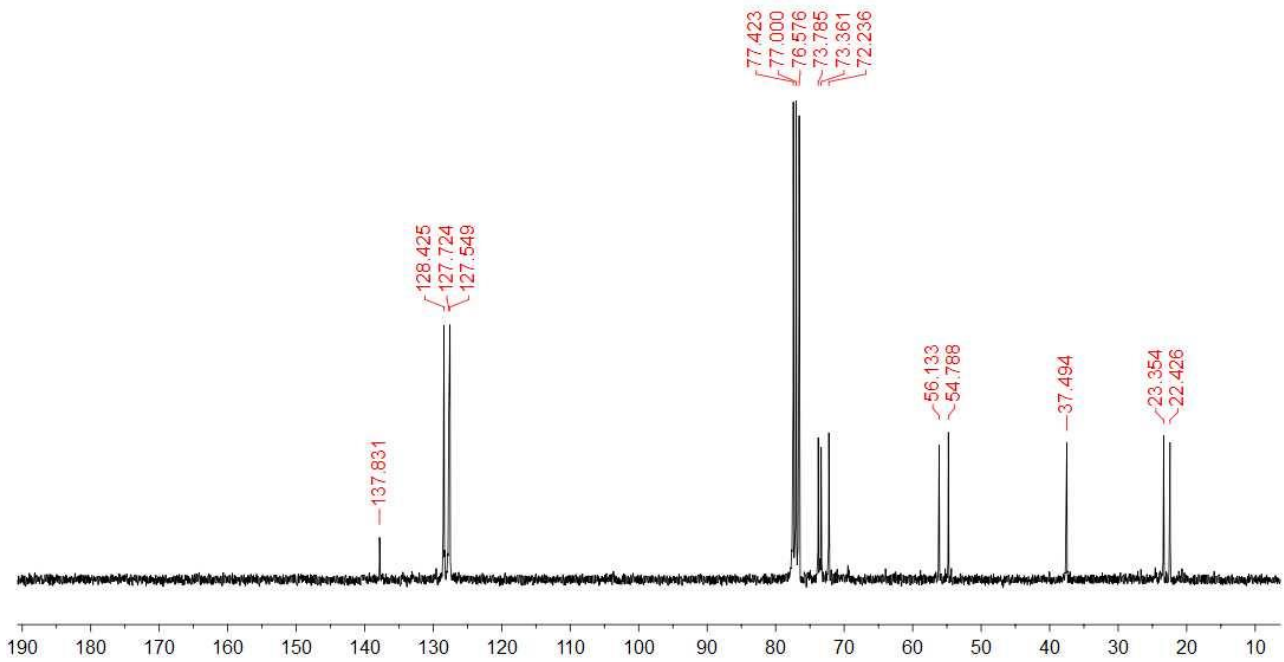

300 MHz, CDCl<sub>3</sub>

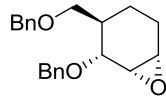

7

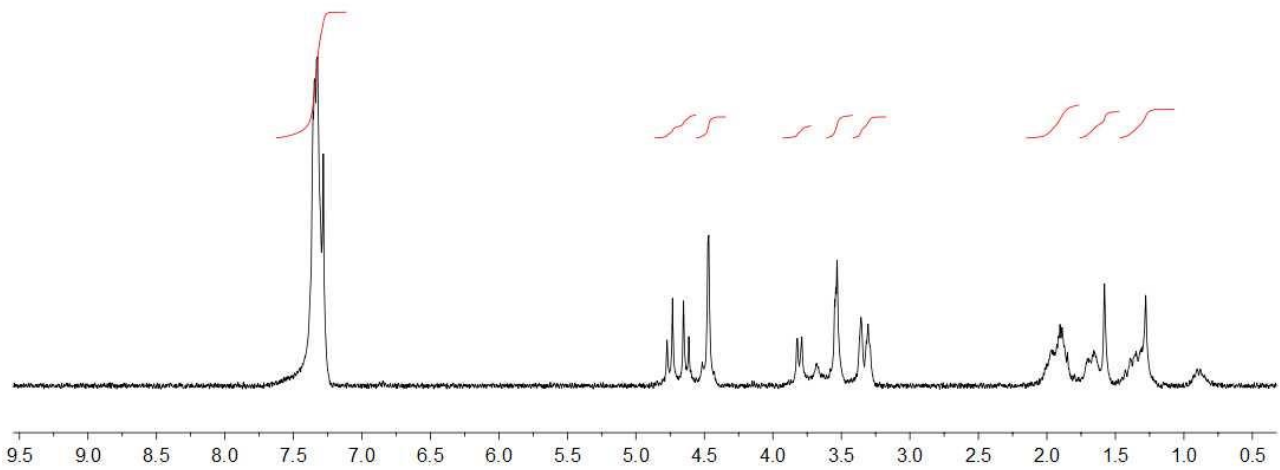

75 MHz, CDCl<sub>3</sub>

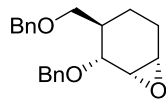

7

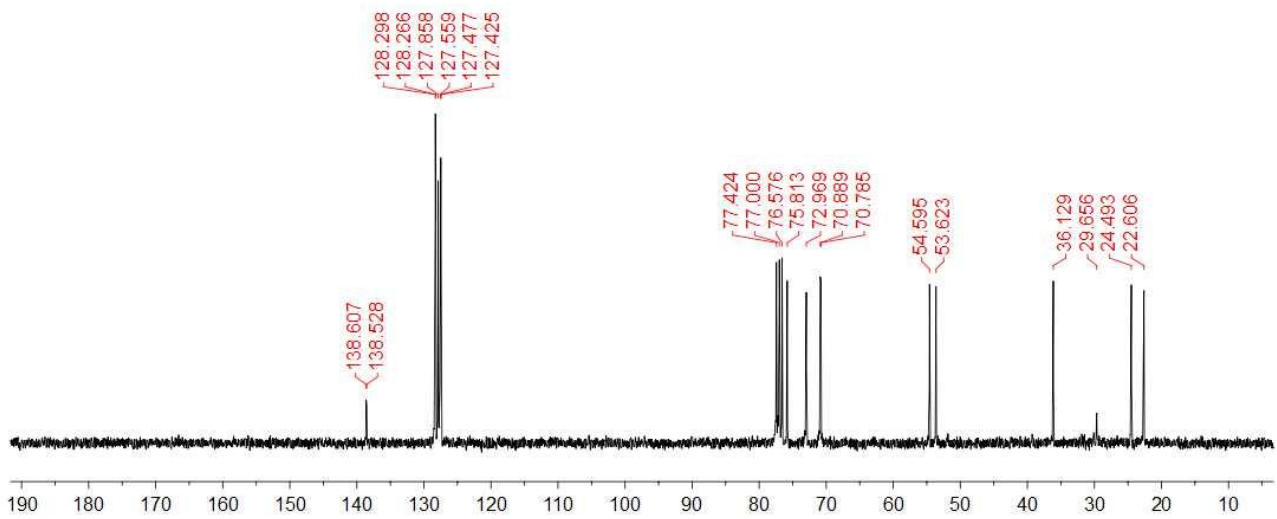

500 MHz, CDCl<sub>3</sub>

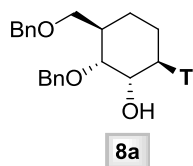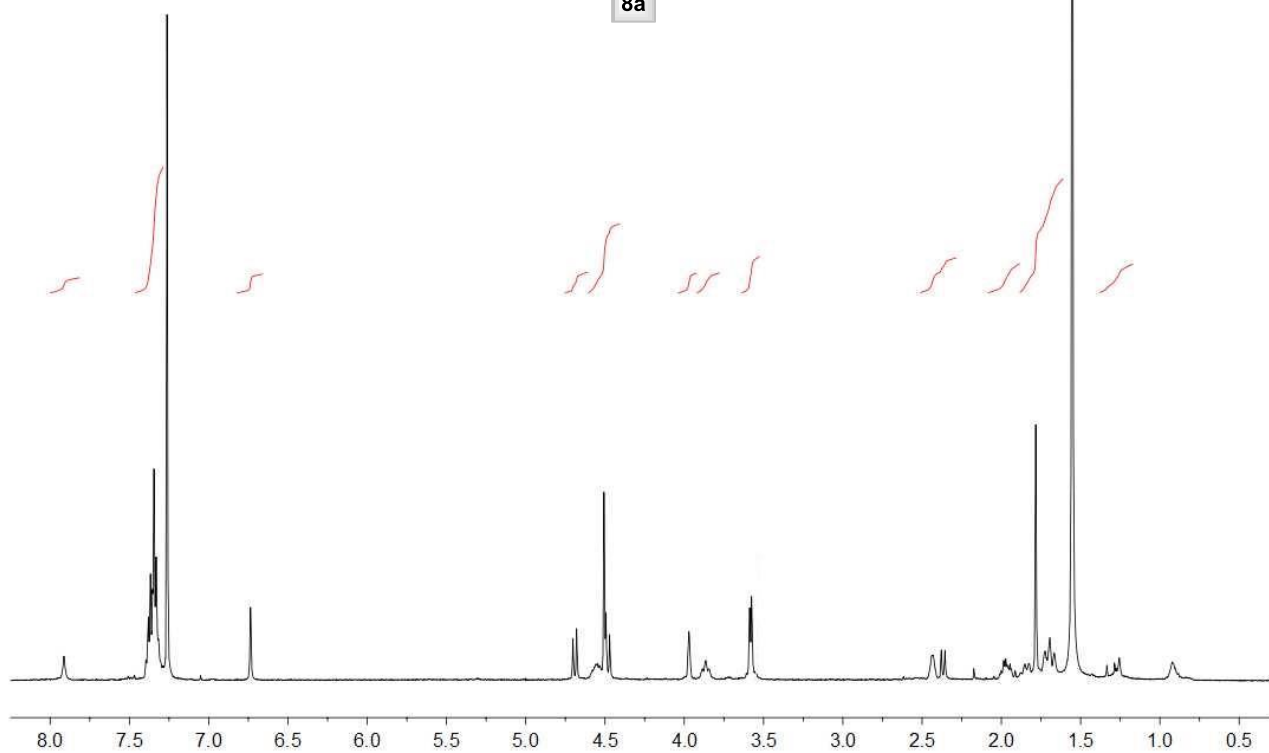

75 MHz, CDCl<sub>3</sub>

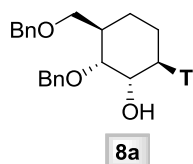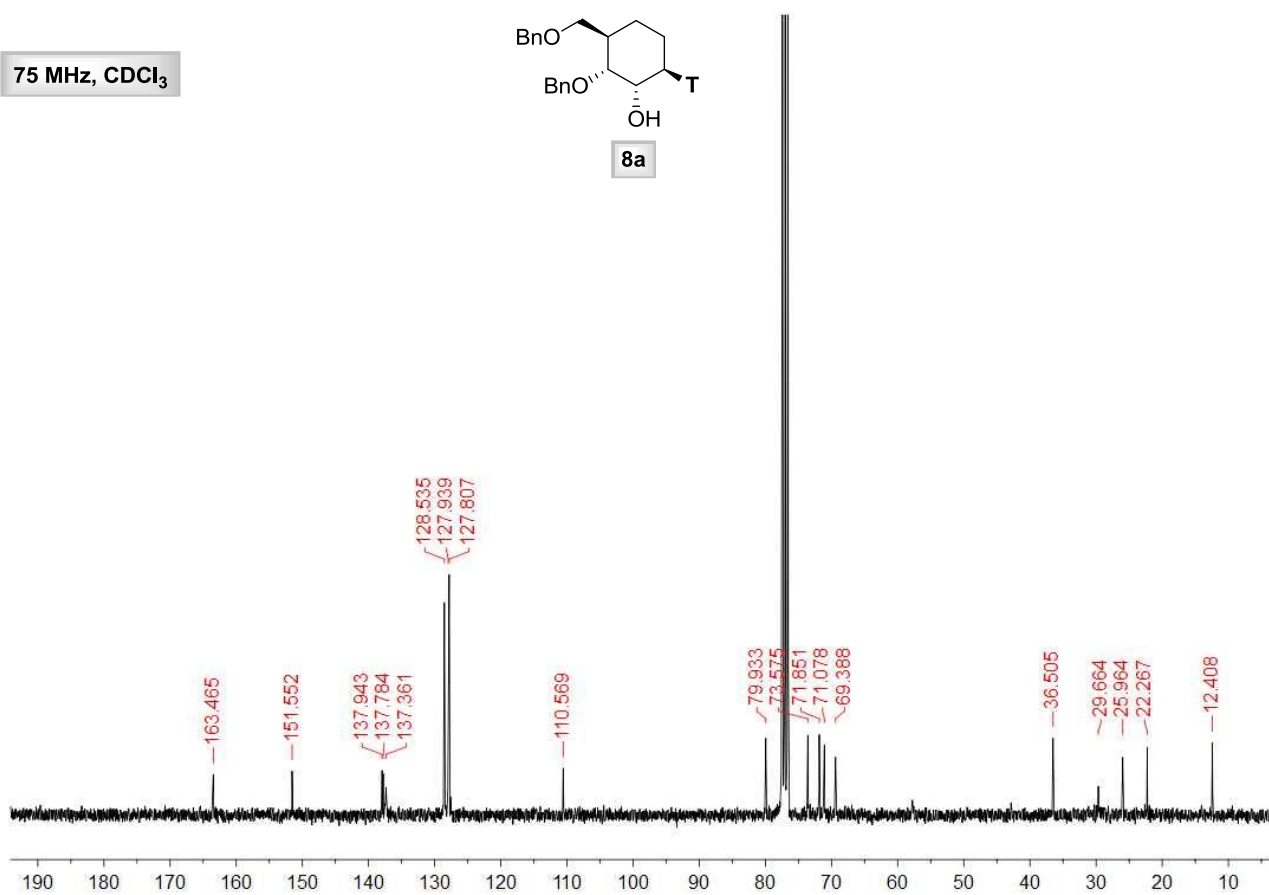

400 MHz, CDCl<sub>3</sub>

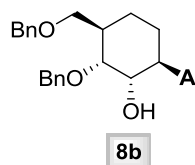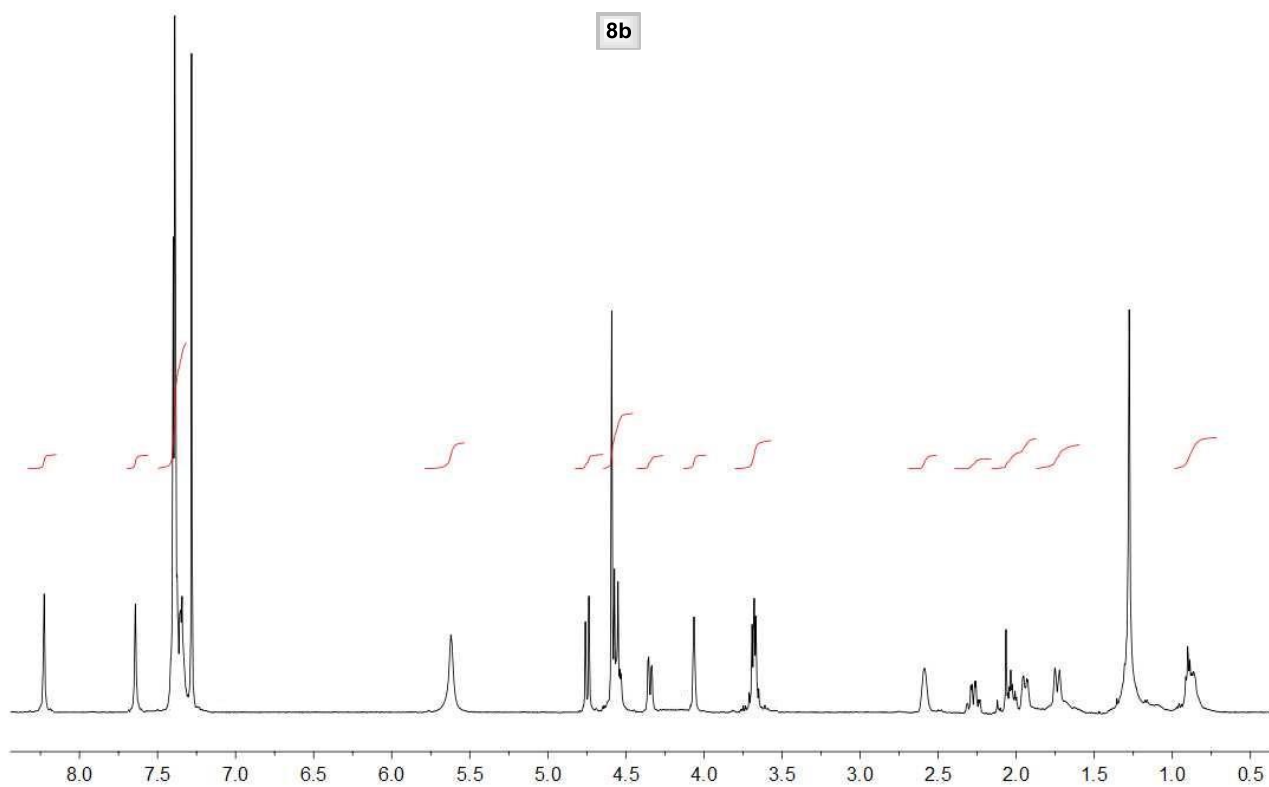

100 MHz, CDCl<sub>3</sub>

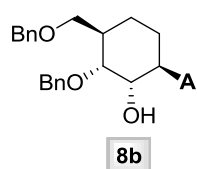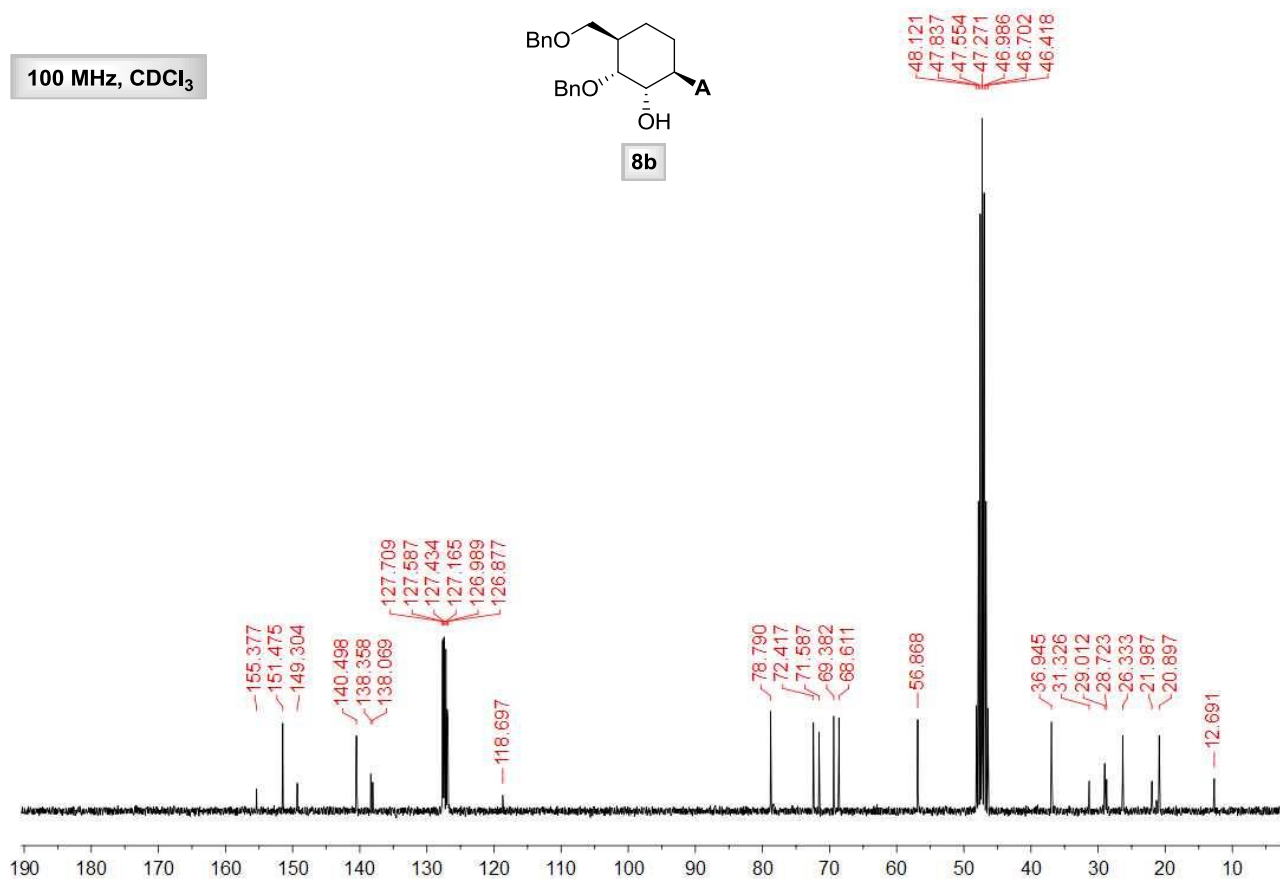

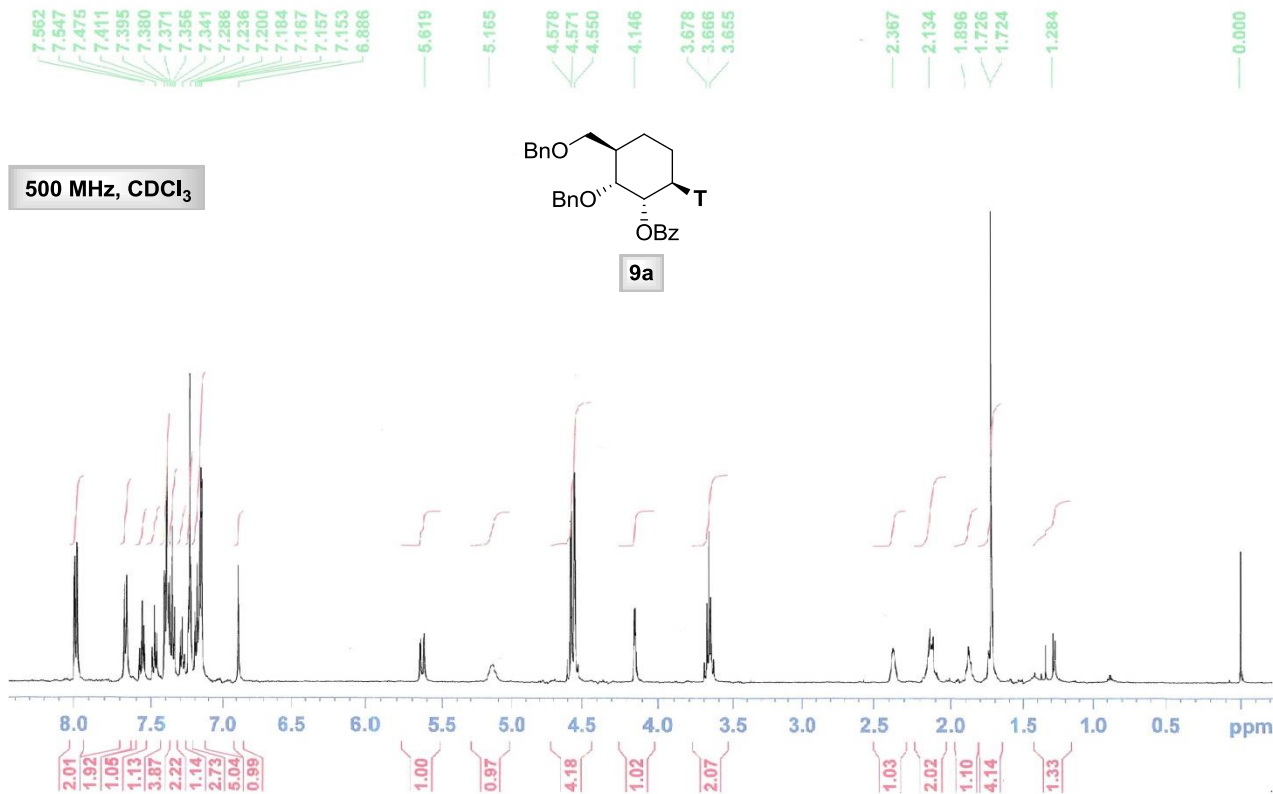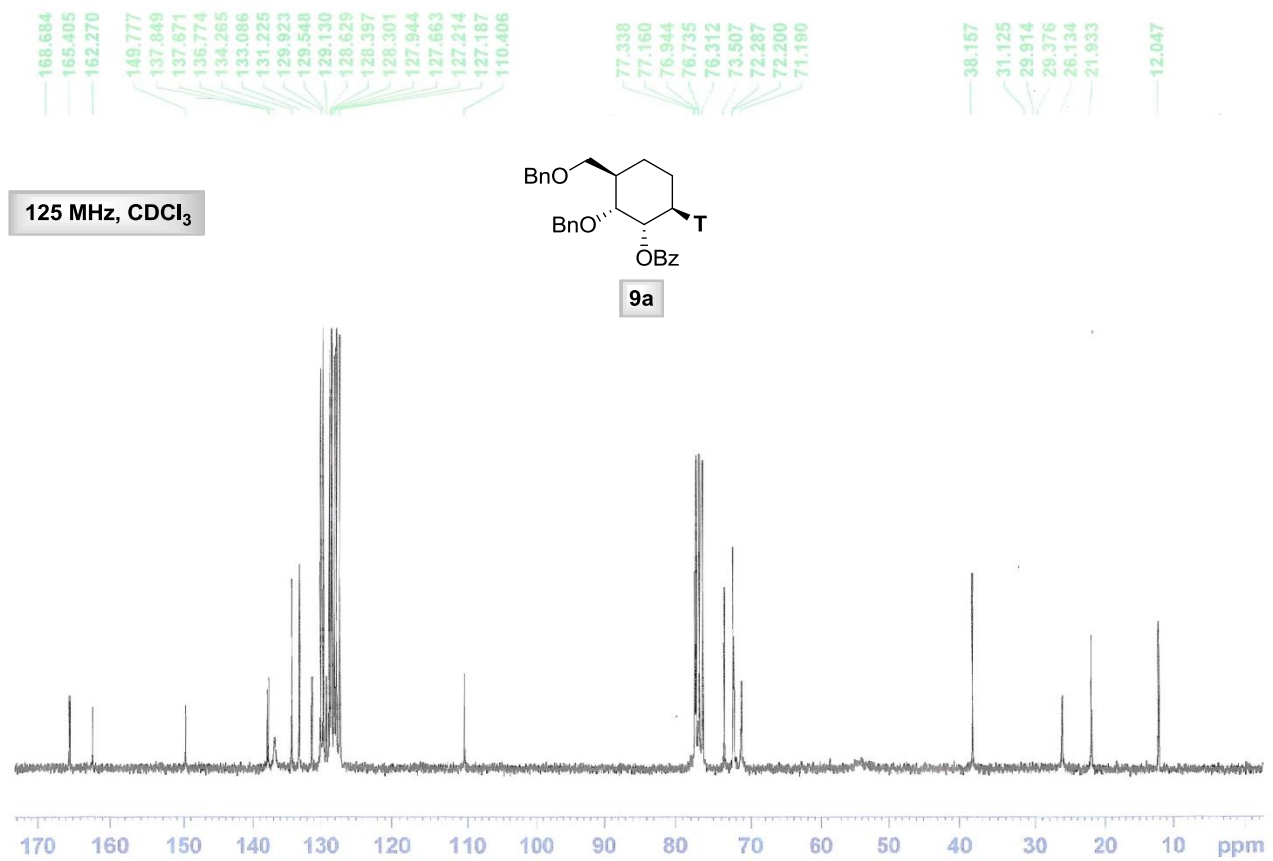



500 MHz, DMSO-d<sub>6</sub>

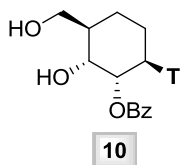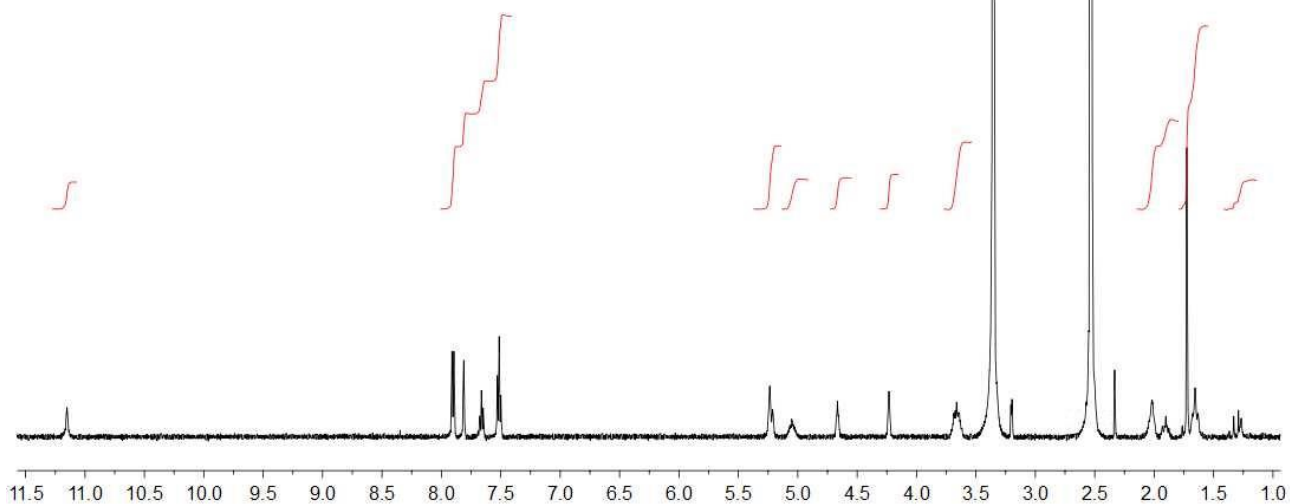

500 MHz, DMSO-d<sub>6</sub>

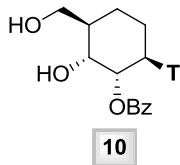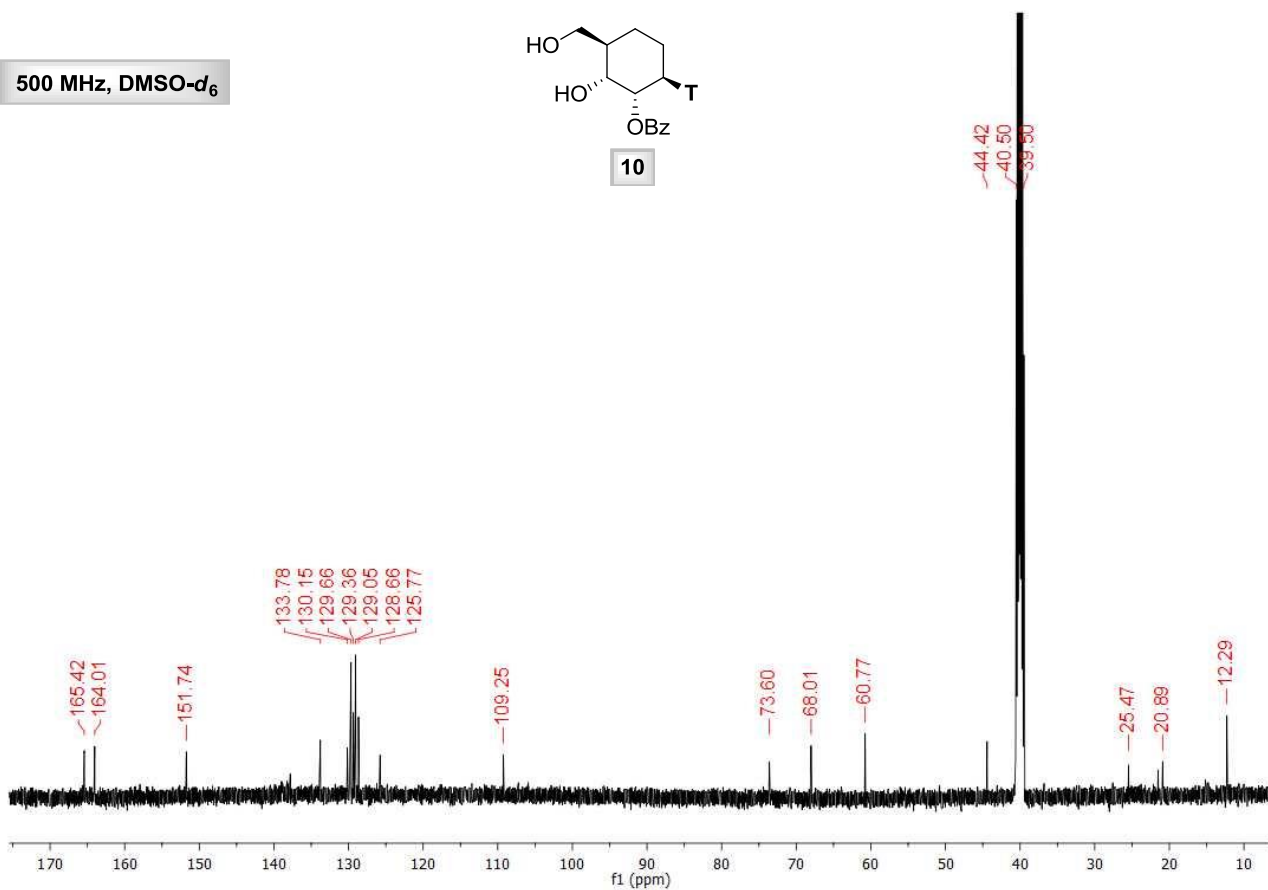

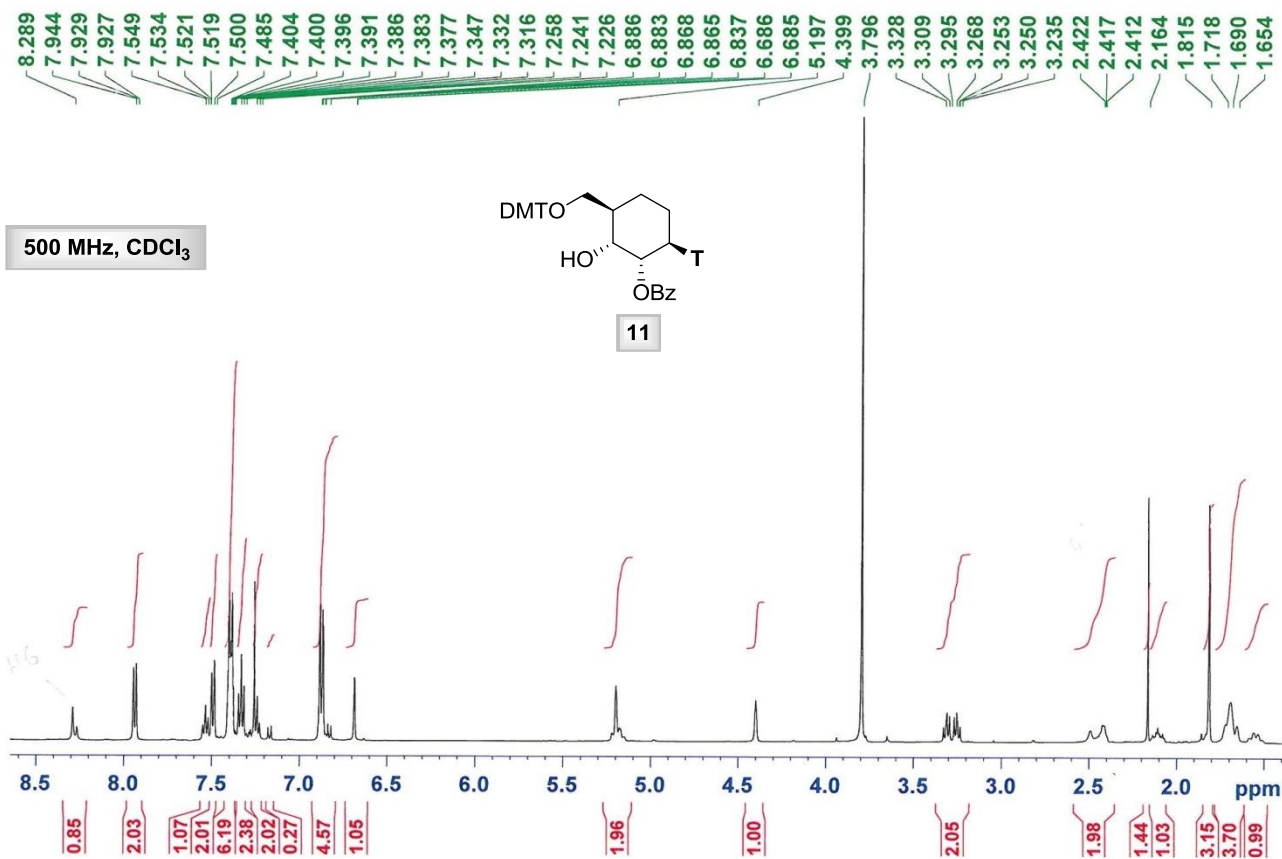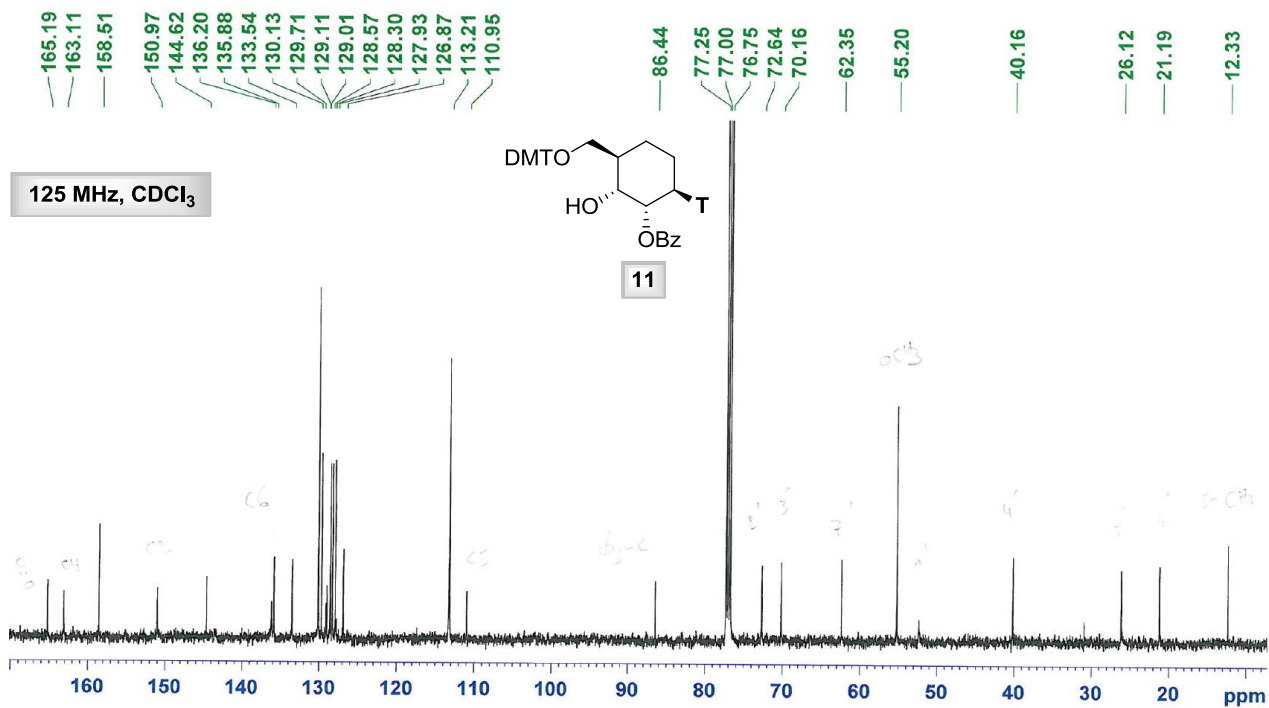

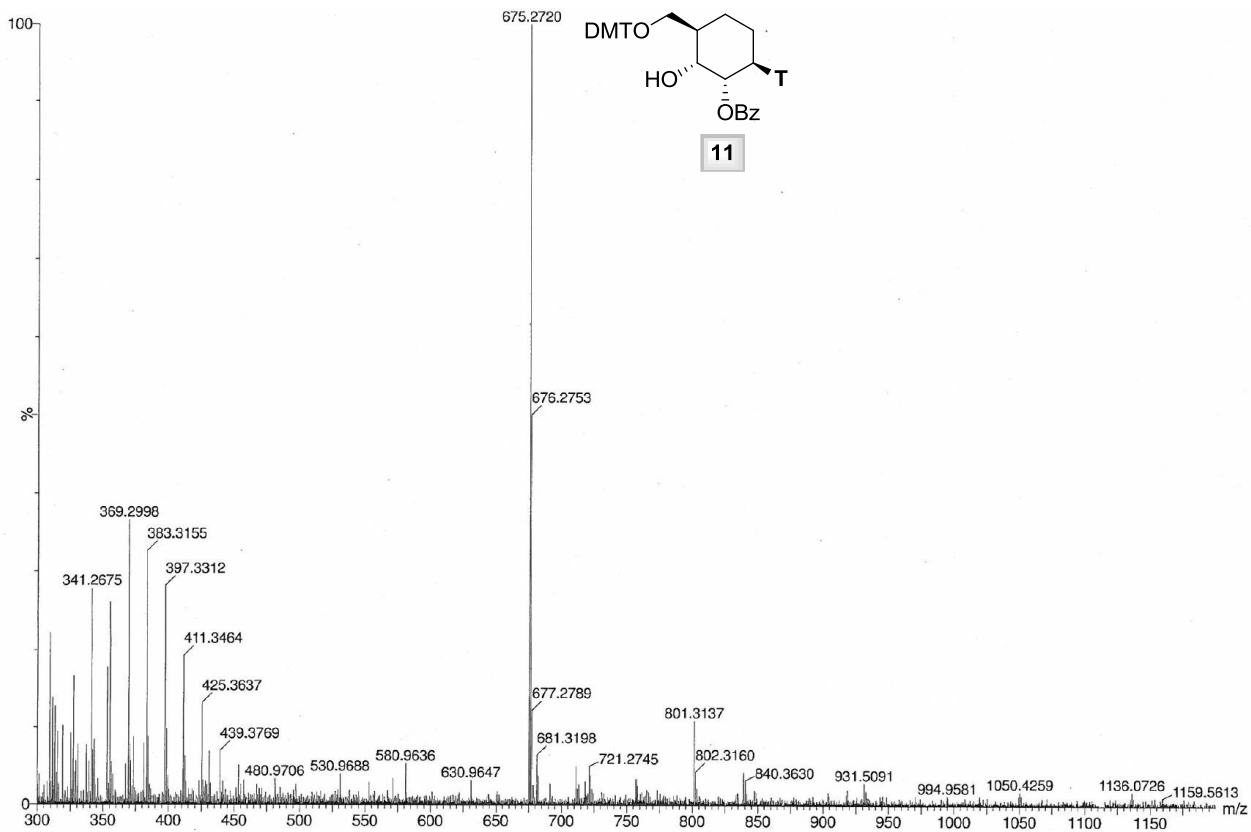

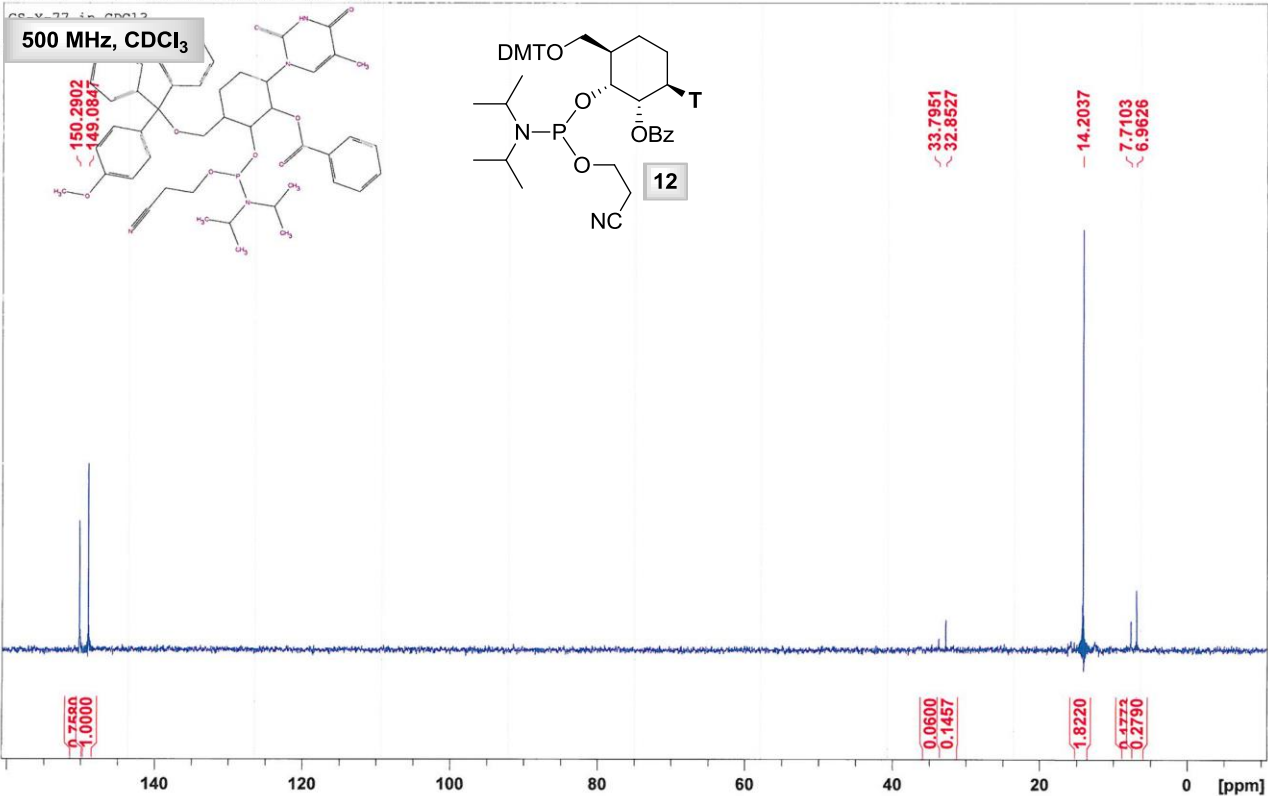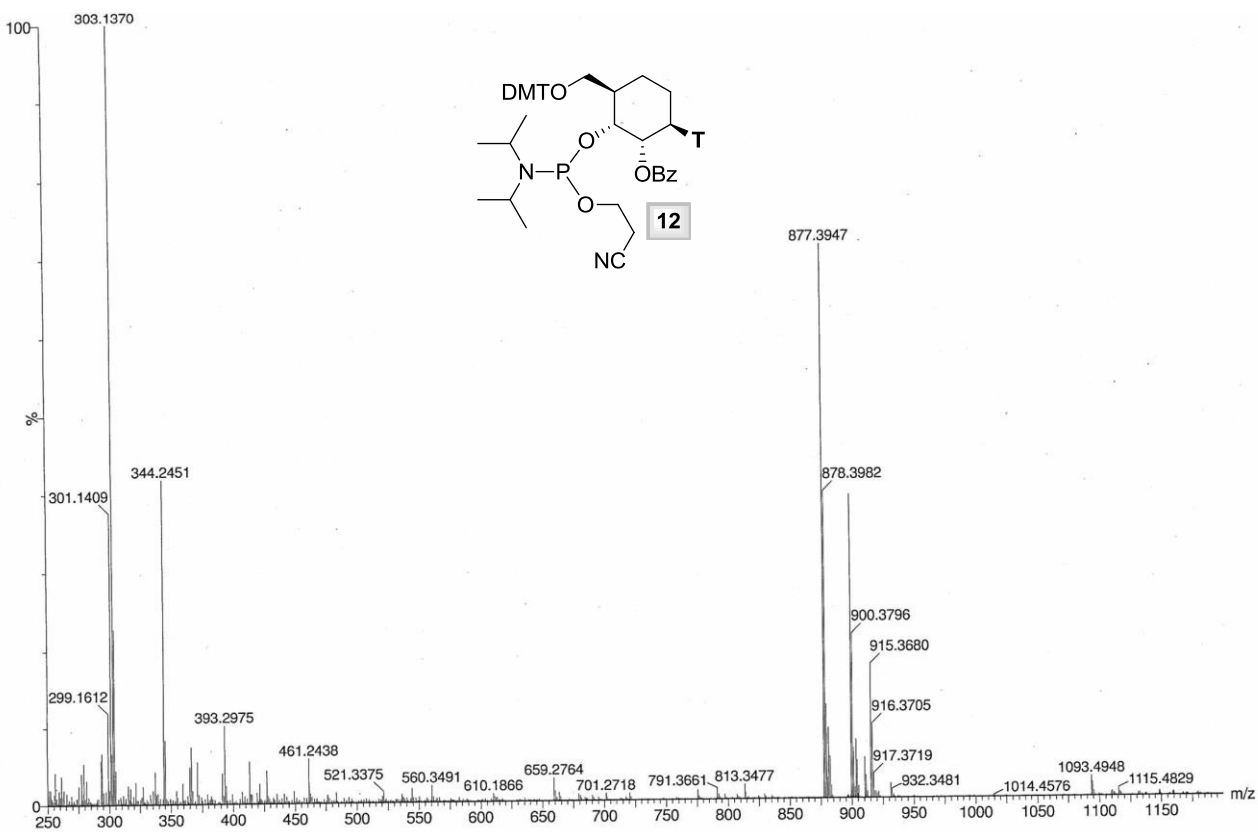

400 MHz, DMSO-*d*<sub>6</sub>

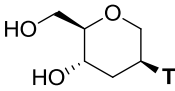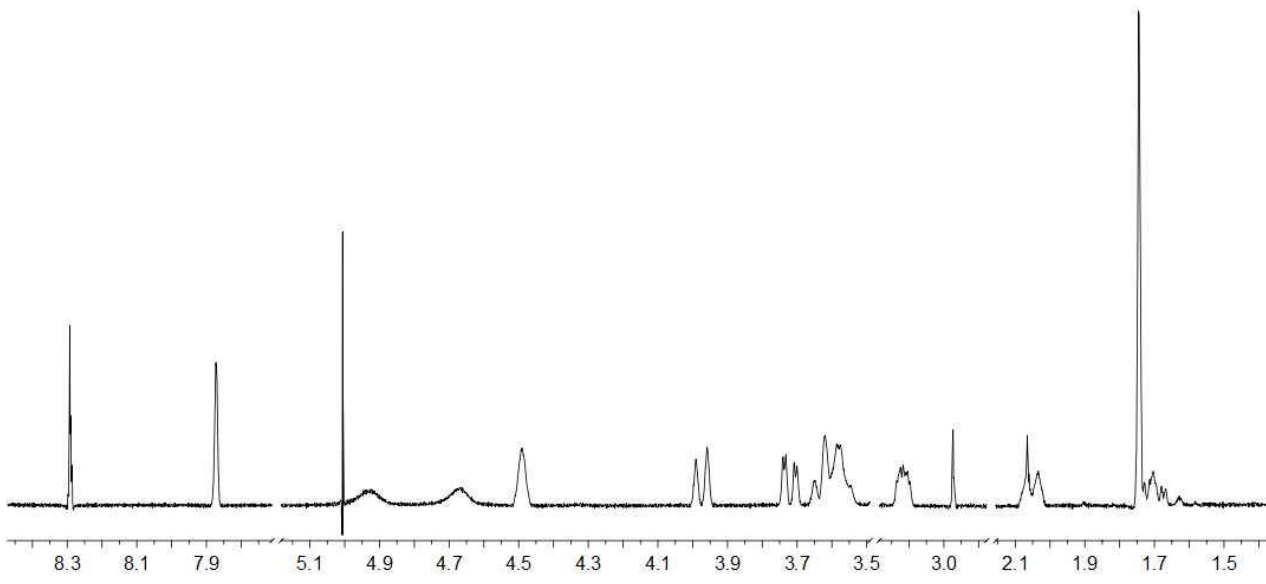

600 MHz, DMSO-*d*<sub>6</sub>

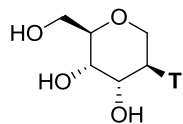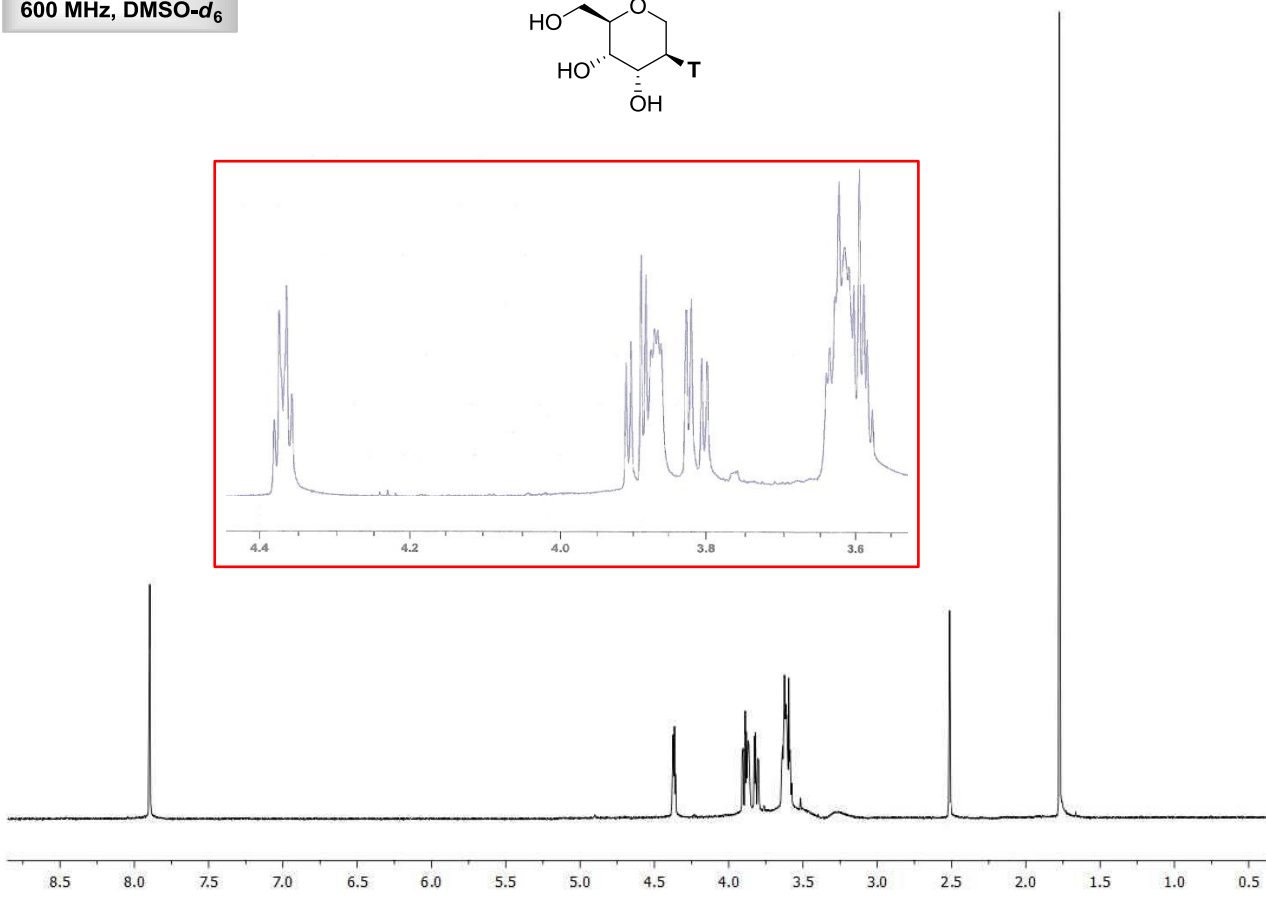

500 MHz, DMSO-*d*<sub>6</sub>

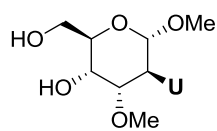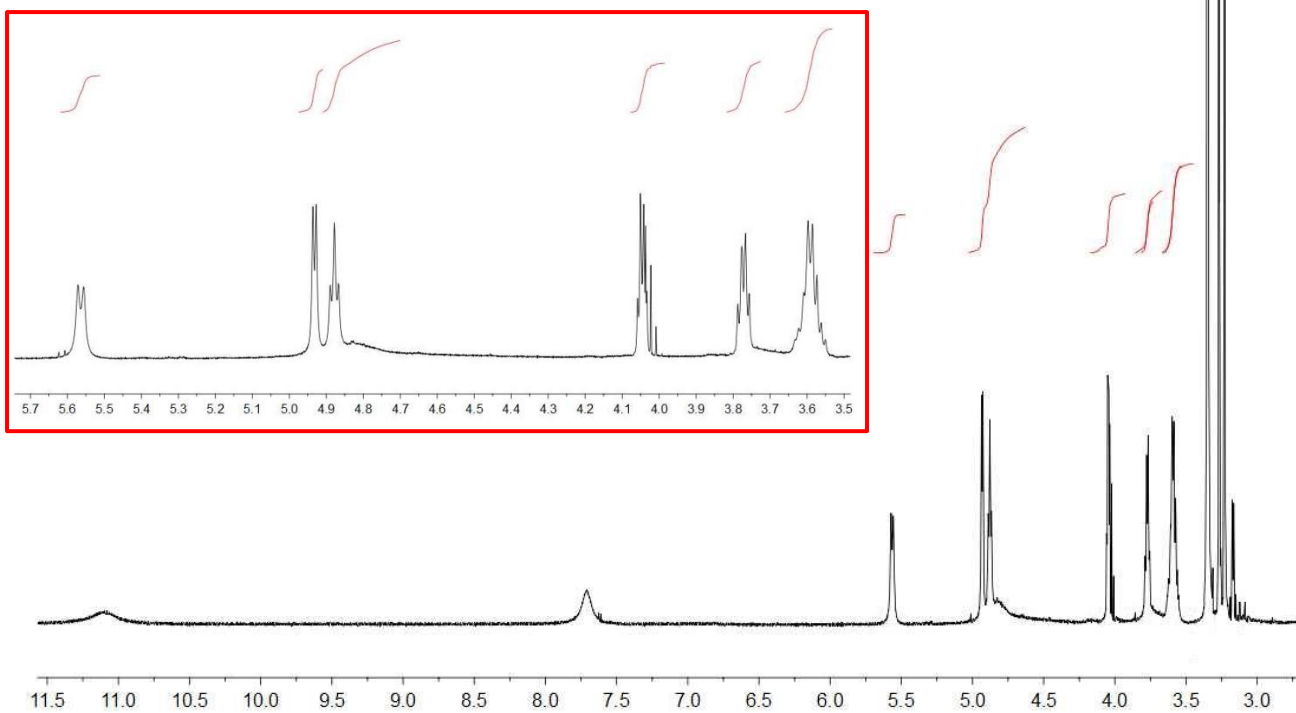

600 MHz, DMSO-*d*<sub>6</sub>

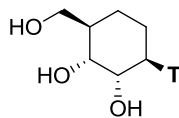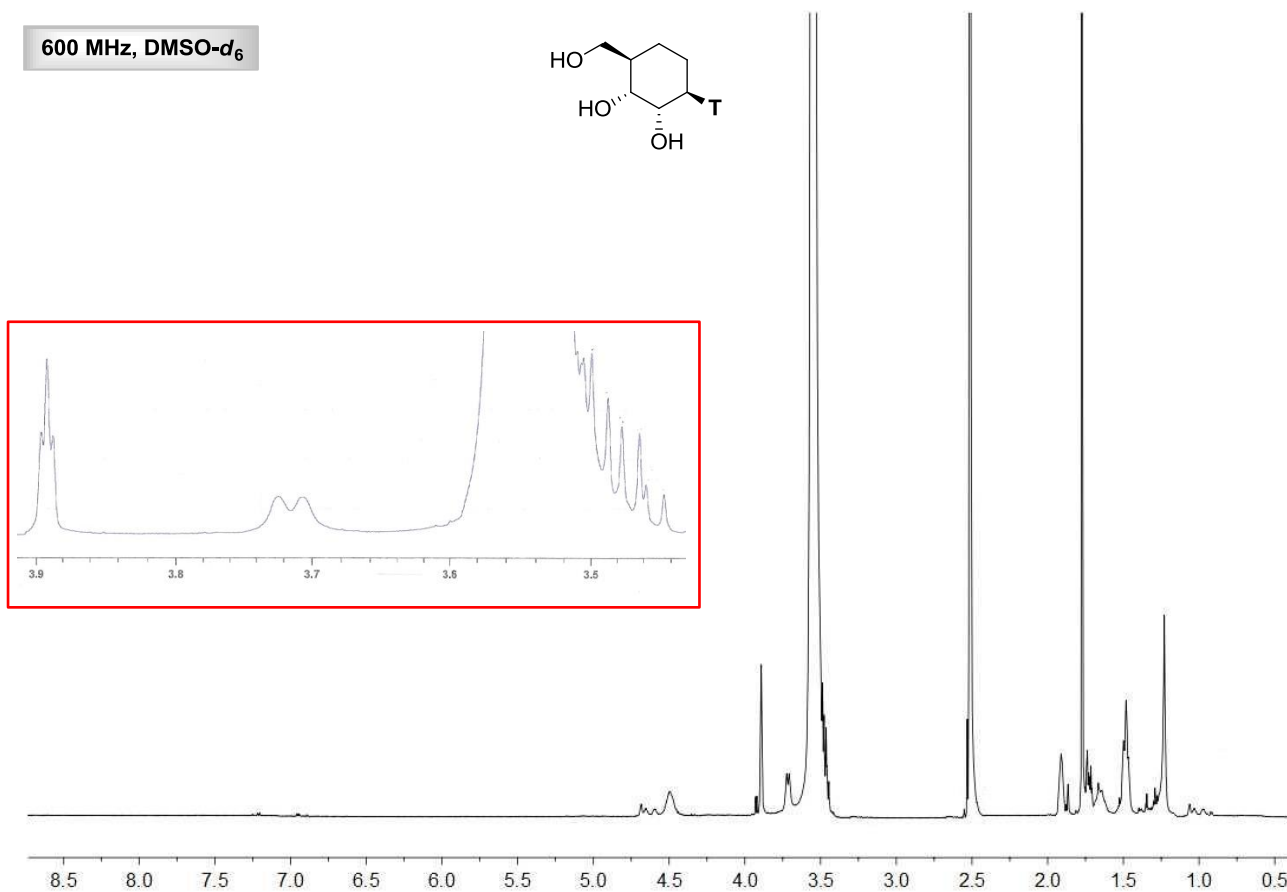

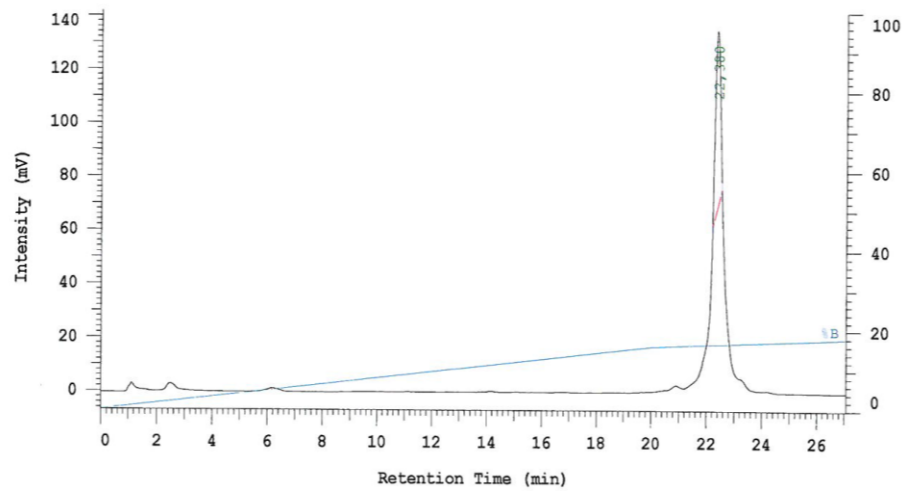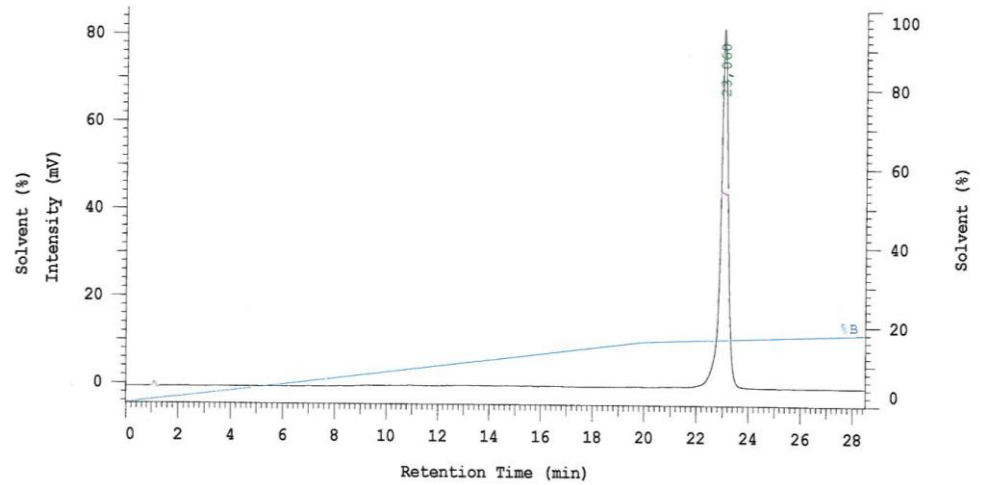

HPLC profiles of the purified oligonucleotide sequences 5'-r(GCGU)-cT\*-r(UGCG)-3' and 5'-d(GCGT)-cT\*-d(TGCG)-3'.

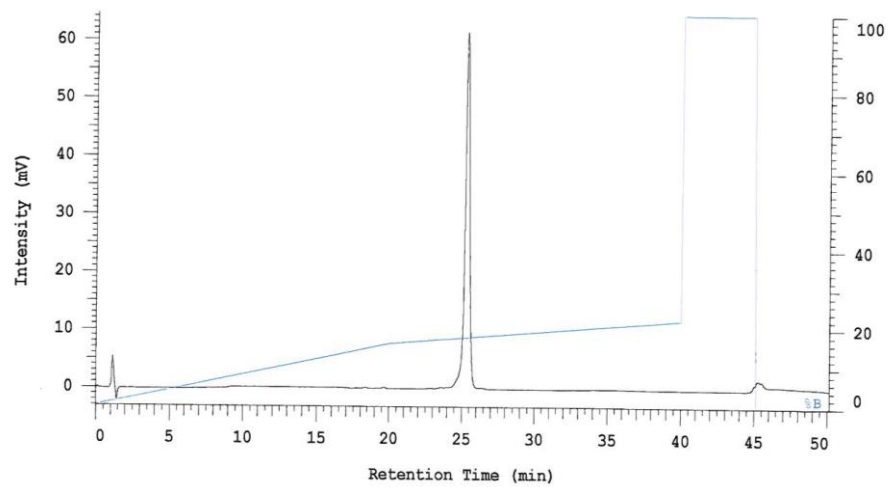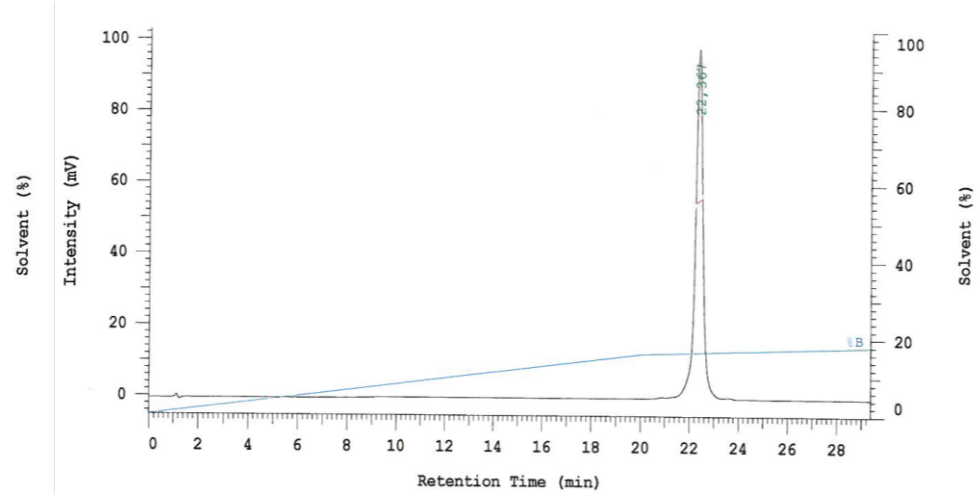

HPLC profiles of the purified oligonucleotide sequences 5'-d(CACCG)-cT\*-d(TGCTACC)-3' and 5'-d(CGCA)-cT\*-d(ACGC)-3'.

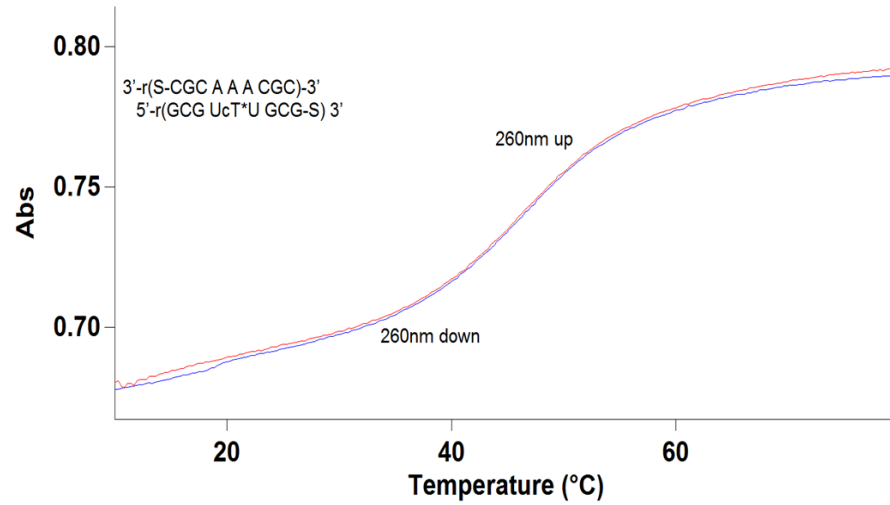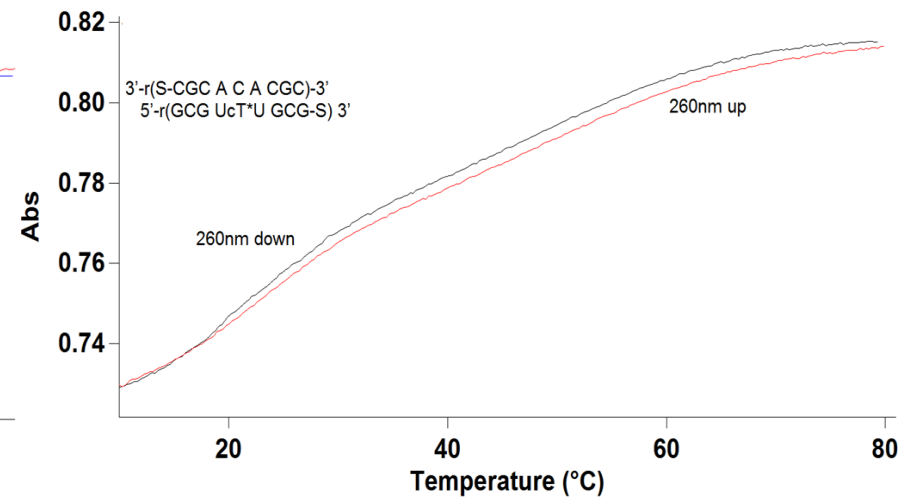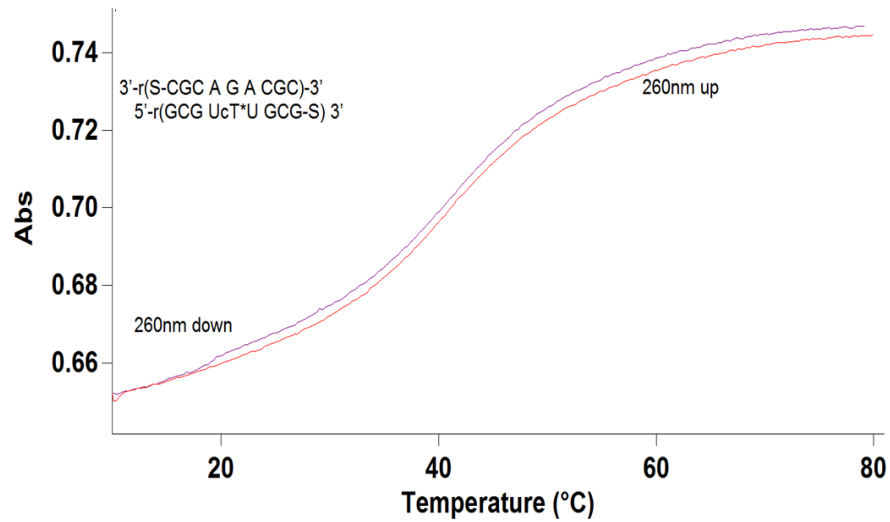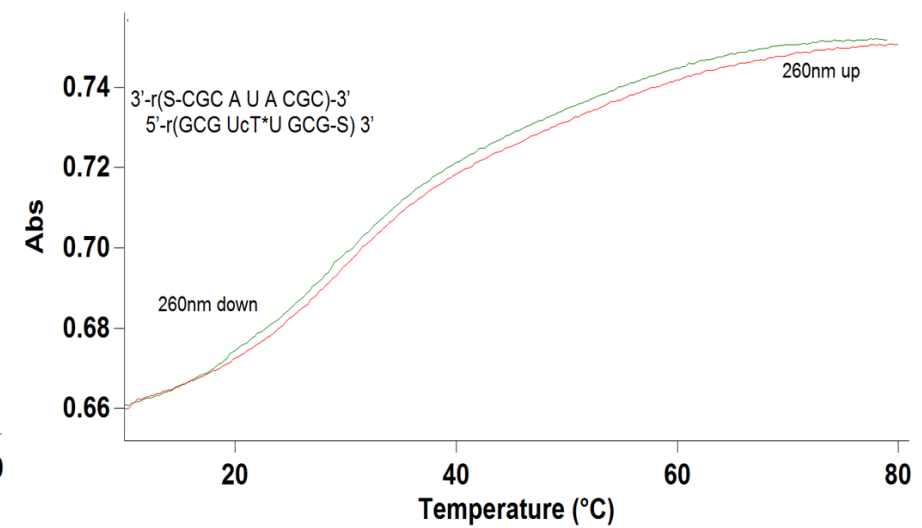

Melting curves of complementary RNA duplexes [5'-r(GCGUcT\*UGCG)/5'-r(CGCA~~Y~~ACGC)] (Y: A, C, G, U). All measures were taken in 0.1 M NaCl, 20 mM KH<sub>2</sub>PO<sub>4</sub>, 0.1 mM Na<sub>2</sub>EDTA, pH 7.5.



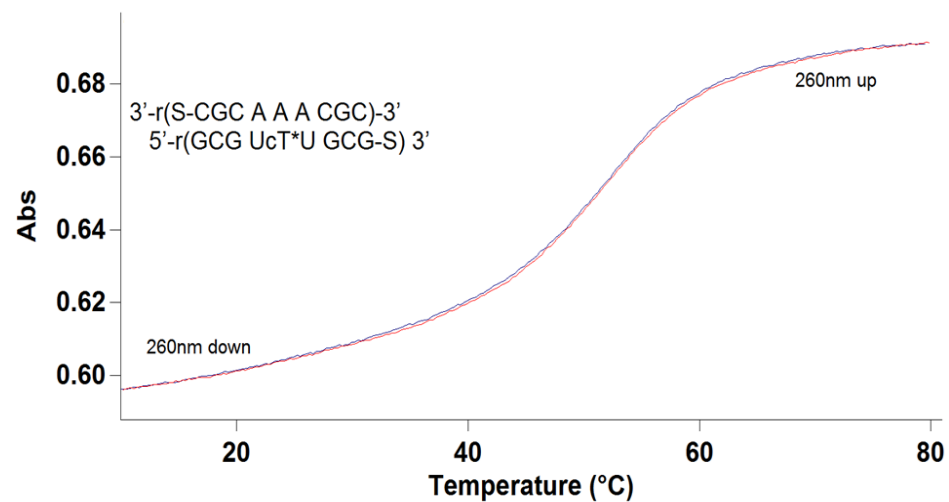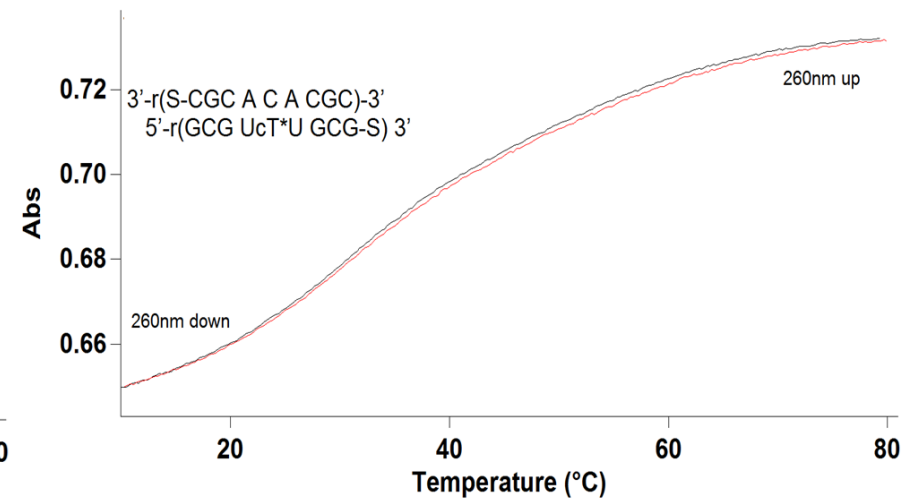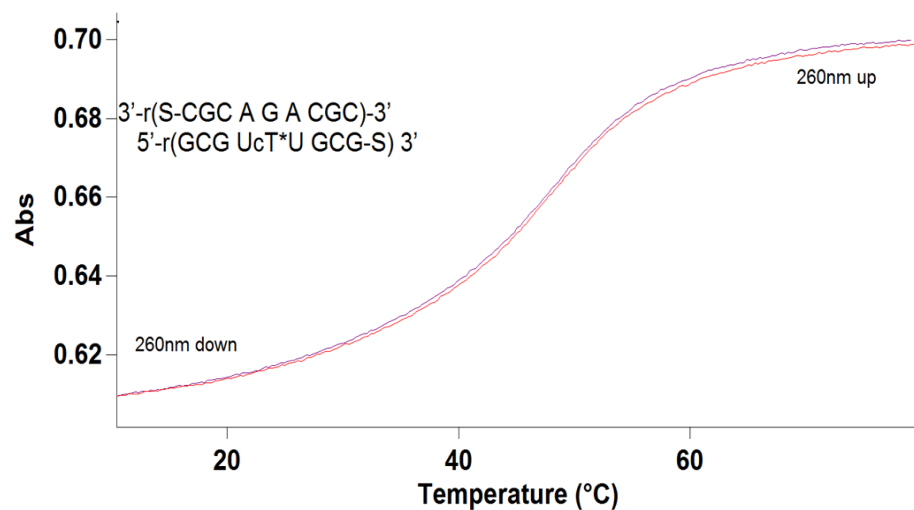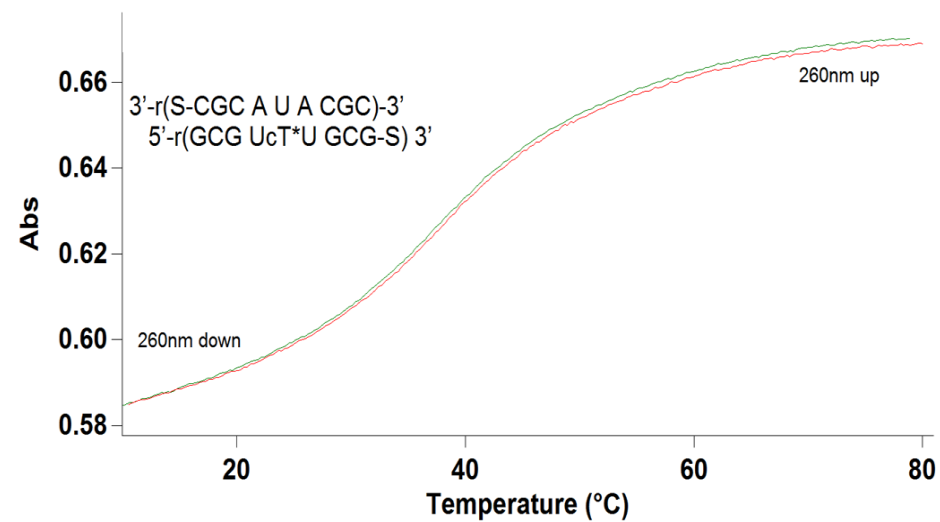

Melting curves of complementary RNA duplexes [5'-r(GCGUcT\*UGCG)/5'-r(CGCA $\mathbf{Y}$ ACGC)] ( $\mathbf{Y}$ : A, C, G, U). All measures were taken in 1 M NaCl, 20 mM KH<sub>2</sub>PO<sub>4</sub>, 0.1 mM Na<sub>2</sub>EDTA, pH 7.5.
